# Supplementary material
Source: PubMed Central journal article supplement (PMC6389765)
Supplement: Supp_Fig1.pdf [file Supp_Fig1.pdf]

## Supplementary Data

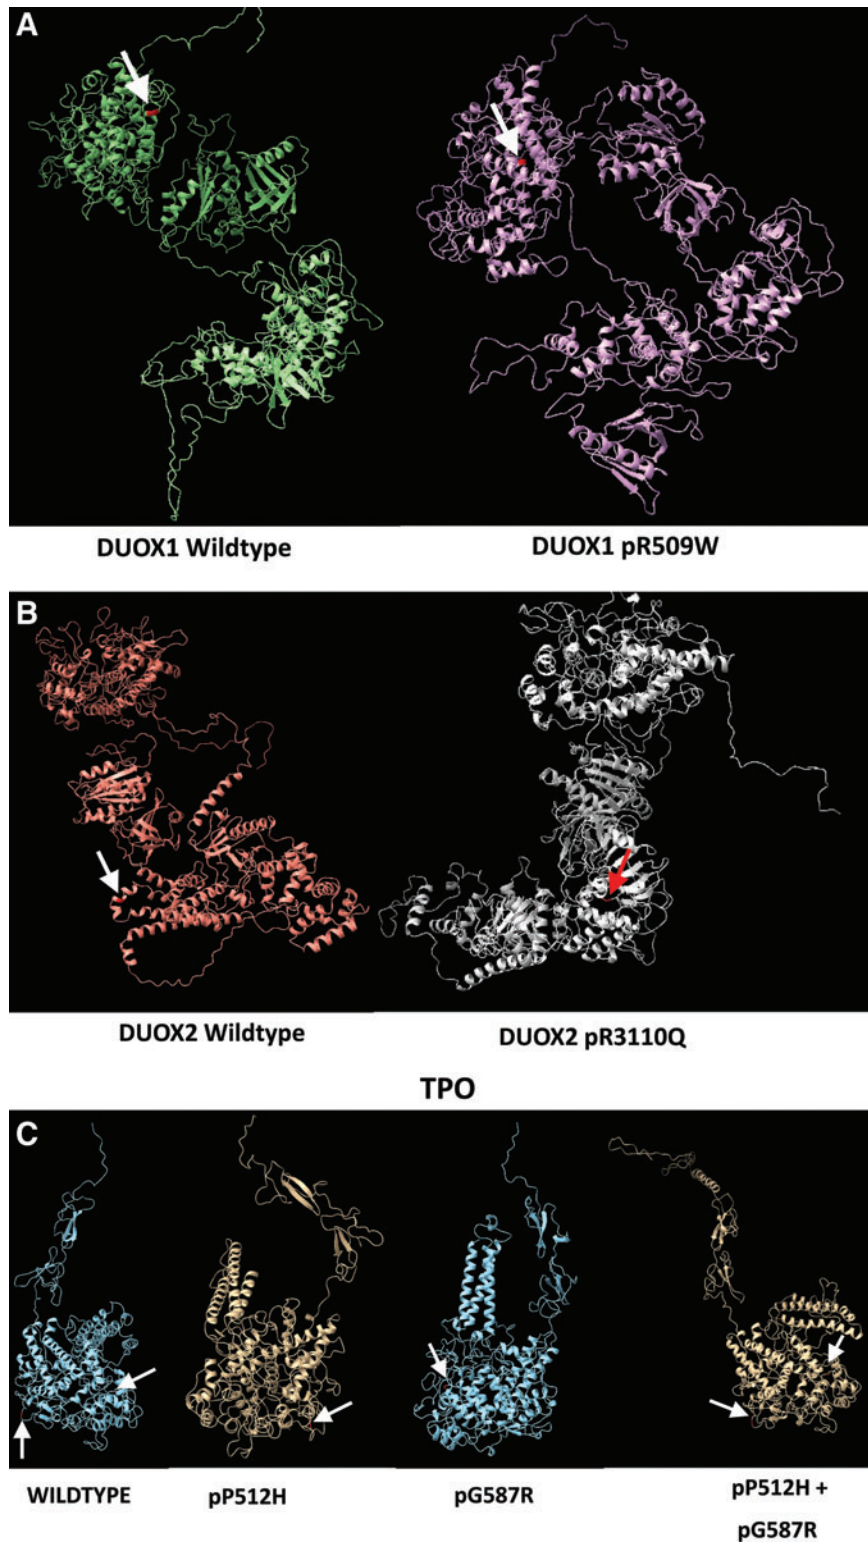

**SUPPLEMENTARY FIG. S1.** Protein modeling *in silico* was performed for each molecule, wild type and mutant: DUOX1 (A), DUOX2 (B), and TPO (C). All reported mutations result in significant protein conformational changes as shown. Methodology for modeling: Kallberg M, Wang H, Wang S, Peng J, Wang Z, Lu H, Xu J 2012 Template-based protein structure modeling using the RaptorX web server. *Nat Protoc* **7**:1511–1522. Ma J, Peng J, Wang S, Xu J 2012 A conditional neural fields model for protein threading. *Bioinformatics* **28**:i59–i66. Ma J, Wang S, Zhao F, Xu J 2013 Protein threading using context-specific alignment potential. *Bioinformatics* **29**:i257–i265.
