# Supplementary material
Source: PubMed Central journal article supplement (PMC6389765)
Supplement: Supp_Table1.pdf [file Supp_Table1.pdf]

SUPPLEMENTARY TABLE S1. LIST OF GENES RELATED TO THYROID DISORDERS

| <i>Gene</i>              | <i>Condition</i>                                                          |
|--------------------------|---------------------------------------------------------------------------|
| <i>ALB</i>               | Familial dysalbuminemic hyperthyroxinemia (FDH)                           |
| <i>ALMS1</i>             | Alstrom syndrome                                                          |
| <i>CDCA8</i>             | Thyroid dysgenesis                                                        |
| <i>DIO1</i>              | High T4                                                                   |
| <i>DIO2</i>              | High T4                                                                   |
| <i>DIO3</i>              | Low rT3                                                                   |
| <i>DUOX1</i>             | Thyroid dysmorphogenesis                                                  |
| <i>DUOX2</i>             | Thyroid dysmorphogenesis                                                  |
| <i>DUOXA2</i>            | Thyroid dysmorphogenesis                                                  |
| <i>FGF8</i>              | Combined pituitary hormone deficiency                                     |
| <i>FOXE1 (TTF2)</i>      | Thyroid dysgenesis                                                        |
| <i>GLIS3</i>             | Thyroid dysgenesis                                                        |
| <i>HHEX</i>              | Thyroid dysgenesis                                                        |
| <i>IGSF1</i>             | Central hypothyroidism                                                    |
| <i>IRS4</i>              | Central hypothyroidism                                                    |
| <i>IYD (DEHAL1)</i>      | Thyroid dysmorphogenesis                                                  |
| <i>JAG1</i>              | Thyroid dysgenesis                                                        |
| <i>KDM6A</i>             | Kabuki Syndrome                                                           |
| <i>KMT2D</i>             | Kabuki Syndrome                                                           |
| <i>NCOR2</i>             | (Corepressor of TH receptors)                                             |
| <i>NKX2-1 (TTF1)</i>     | Thyroid dysgenesis                                                        |
| <i>NKX2-3</i>            | Thyroid dysgenesis                                                        |
| <i>NKX2-5</i>            | Thyroid dysgenesis                                                        |
| <i>NKX2-6</i>            | Thyroid dysgenesis                                                        |
| <i>NTN1</i>              | Thyroid dysgenesis                                                        |
| <i>PAX8</i>              | Thyroid dysgenesis                                                        |
| <i>POU1F1</i>            | Combined pituitary hormone deficiency                                     |
| <i>PROP1</i>             | Combined pituitary hormone deficiency                                     |
| <i>PTRH2</i>             | Infantile-onset multisystem neurologic, endocrine, and pancreatic disease |
| <i>RYR2</i>              | Hyperemesis                                                               |
| <i>SALL1</i>             | Townes–Brocks syndrome                                                    |
| <i>SECISBP2</i>          | SBP2 deficiency                                                           |
| <i>SERPINA7(TBG)</i>     | TBG deficiency                                                            |
| <i>SLC16A2(MCT8)</i>     | MCT8 deficiency                                                           |
| <i>SLC26A4(PDS)</i>      | Thyroid dysmorphogenesis                                                  |
| <i>SLC5A5(NIS)</i>       | Thyroid dysmorphogenesis                                                  |
| <i>SLC30A10</i>          | SLC30A10 deficiency                                                       |
| <i>SLCO1C1 (OATP1C1)</i> | OATP1C1 (T4 transporter) deficiency                                       |
| <i>STAMBP</i>            | Microcephaly-capillary malformation syndrome                              |
| <i>TBLIX</i>             | Hypersensitivity to thyroid hormone                                       |
| <i>TBX1</i>              | Thyroid dysgenesis                                                        |
| <i>TG</i>                | Thyroid dysmorphogenesis                                                  |
| <i>THRA</i>              | Resistance to TH                                                          |
| <i>THRB</i>              | Resistance to TH                                                          |
| <i>TPO</i>               | Thyroid dysmorphogenesis                                                  |
| <i>TRH</i>               | Central hypothyroidism                                                    |
| <i>TRHR</i>              | Resistance to TRH                                                         |
| <i>TRIP11</i>            | (Interactor of TH receptor)                                               |
| <i>TRIP12</i>            | (Interactor of TH receptor)                                               |
| <i>TSHB</i>              | Central hypothyroidism                                                    |
| <i>TSHR</i>              | Thyroid dysgenesis/resistance to TSH                                      |
| <i>TTR</i>               | Dystransthyretinemic hyperthyroxinemia                                    |
| <i>UBR1</i>              | Johanson–Blizzard syndrome                                                |
