# Supplementary material
Source: PubMed Central journal article supplement (PMC6389765)
Supplement: Supp_Tables2-4.pdf [file Supp_Tables2-4.pdf]

SUPPLEMENTARY TABLE S2. PREDICTION OF FUNCTIONAL EFFECT OF THE VARIANTS BY *IN SILICO*  
ALGORITHMS AND ALLELE FREQUENCY

| <i>Gene</i> | <i>Splicing variant</i> | <i>HSF</i> <sup>a</sup>                                                     |  |  |  |  |
|-------------|-------------------------|-----------------------------------------------------------------------------|--|--|--|--|
| <i>TPO</i>  | c.483-2A>G              | -31.7% variation                                                            |  |  |  |  |
| <i>TG</i>   | c.5042-2A>G             | Alteration of the wild type acceptor site, most probably affecting splicing |  |  |  |  |
|             |                         | -30.62% variation                                                           |  |  |  |  |
|             |                         | Alteration of the wild type acceptor site, most probably affecting splicing |  |  |  |  |

  

| <i>Gene</i>  | <i>Missense variants</i> |          | <i>RS number</i> | <i>SIFT</i> <sup>b</sup> | <i>PolyPhen2</i> <sup>c</sup> | <i>AAF</i> <sup>d</sup> |
|--------------|--------------------------|----------|------------------|--------------------------|-------------------------------|-------------------------|
| <i>TPO</i>   | c.1535C>A                | p.P512H  | rs150489706      | 0.01, D                  | 0.999, D                      | 0.00001252              |
| <i>TPO</i>   | c.1759G>A                | p.G587R  | rs770562452      | 0.001, D                 | 1.000, D                      | 0.000                   |
| <i>DUOX2</i> | c.3329G>A                | p.R1110Q | rs368488511      | 0.003, D                 | 0.994, D                      | 0.000                   |
| <i>DUOX1</i> | c.1525C>T                | p.R509W  | rs757808802      | 0.000, D                 | 1.0, D                        | 0.000                   |

<sup>a</sup>The Human Splicing Finder. Possible predictions: site broken (variation score <-10%), new site (variation score >10%).

<sup>b</sup>The scores and predictions are separated by a comma. There are two possible predictions: D (damaging, score ≤0.05); T (tolerated, score >0.05).

<sup>c</sup>Polymorphism Phenotyping v2. The scores and predictions are separated by a comma. There are three possible predictions: D (probably damaging, score ≥0.909), P (possibly damaging, 0.447 ≤ score ≤0.909), B (benign, score ≤0.446).

<sup>d</sup>Alternative allele frequency in African population in The Genome Aggregation Database.  
RS number, reference single nucleotide variants number.

SUPPLEMENTARY TABLE S3. SPLICING PREDICTION FOR THYROGLOBULIN ACCORDING TO THE FORMULA OF SHAPIRO AND SENAPATHY

Splicing

TG Intron between ex25 and ex26 c.5042-2A>G

5' splice site—AAAAGG/gtaggttg

3' splice site—tgcctttcccc(a)g/GCCAAG

% Nucleotide at splice junction

| Norm—5' |   |     | Norm—3' |   |     | Mutated—3' |   |     |
|---------|---|-----|---------|---|-----|------------|---|-----|
| -3      | A | 28  | -14     | t | 44  | -14        | t | 44  |
| -2      | G | 13  | -13     | g | 14  | -13        | g | 14  |
| -1      | G | 81  | -12     | c | 34  | -12        | c | 34  |
| +1      | g | 100 | -11     | c | 34  | -11        | c | 34  |
| +2      | t | 100 | -10     | t | 45  | -10        | t | 45  |
| +3      | a | 54  | -9      | t | 44  | -9         | t | 44  |
| +4      | g | 11  | -8      | t | 40  | -8         | t | 40  |
| +5      | g | 85  | -7      | c | 41  | -7         | c | 41  |
| +6      | t | 45  | -6      | c | 44  | -6         | c | 44  |
| T value |   | 517 | -5      | c | 40  | -5         | c | 40  |
|         |   |     | -4      | c | 28  | -4         | c | 28  |
|         |   |     | -3      | c | 79  | -3         | c | 79  |
|         |   |     | -2      | a | 100 | -2         | g | 0   |
|         |   |     | -1      | g | 100 | -1         | g | 100 |
|         |   |     | +1      | G | 47  | +1         | G | 47  |
|         |   |     | T value |   | 734 | T value    |   | 634 |

Score normal = 5' = 100(517 - 65) / (638 - 65) = 78.883  
 Score normal = 3' = 100(734 - 111) / (808 - 111) = **89.383**

Score mutated = 5' = 100(517 - 65) / (638 - 65) = 78.883  
 Score mutated = 3' = 100(634 - 111) / (808 - 111) = **75.036**

Senapathy P, Shapiro MB, Harris NL. 1990 Splice junctions, branch point sites, and exons: Sequence statistics, identification, and applications to genome project. *Methods Enzymol* **183**:252-278.

SUPPLEMENTARY TABLE S4. SPLICING PREDICTION FOR THYROPEROXIDASE ACCORDING TO THE FORMULA OF SHAPIRO AND SENAPATHY

Splicing

TPO ex6 c.483-2A>G

5' splice site—AACAAACAG/gtattgttt

3' splice site—attgtctccac(a)g/AGACCA

% Nucleotide at splice site junction

| Norm—5' |   |     | Norm— 3' |   |     | Mutated—3' |   |     |
|---------|---|-----|----------|---|-----|------------|---|-----|
| -3      | C | 40  | -14      | a | 10  | -14        | a | 10  |
| -2      | A | 59  | -13      | t | 43  | -13        | t | 43  |
| -1      | G | 81  | -12      | t | 48  | -12        | t | 48  |
| +1      | g | 100 | -11      | t | 52  | -11        | t | 52  |
| +2      | t | 100 | -10      | g | 9   | -10        | g | 9   |
| +3      | a | 54  | -9       | t | 44  | -9         | t | 44  |
| +4      | t | 8   | -8       | c | 44  | -8         | c | 44  |
| +5      | t | 4   | -7       | t | 41  | -7         | t | 41  |
| +6      | g | 21  | -6       | c | 44  | -6         | c | 44  |
| T value |   | 467 | -5       | c | 40  | -5         | c | 40  |
|         |   |     | -4       | a | 23  | -4         | a | 23  |
|         |   |     | -3       | c | 79  | -3         | c | 79  |
|         |   |     | -2       | a | 100 | -2         | g | 0   |
|         |   |     | -1       | g | 100 | -1         | g | 100 |
|         |   |     | +1       | A | 28  | +1         | A | 28  |
|         |   |     | T value  |   | 705 | T value    |   | 605 |

5' T-min = 65  
 5' T-max = 638  
 3' T-min = 111  
 3' T-max = 808

Score normal = 5' =  $100(467 - 65) / (638 - 65) = 70.157$   
 Score normal = 3' =  $100(705 - 111) / (808 - 111) = \mathbf{85.222}$

Score mutated = 5' =  $100(467 - 65) / (638 - 65) = 70.157$   
 Score mutated = 3' =  $100(605 - 111) / (808 - 111) = \mathbf{70.875}$

Senapathy P, Shapiro MB, Harris N L 1990 Splice junctions, branch point sites, and exons: Sequence statistics, identification, and applications to genome project. *Methods Enzymol* **183**:252–278.
